# Supplementary material for: Visceral Adipose Tissue Inflammatory Factors (TNF-Alpha, SOCS3) in Gestational Diabetes (GDM): Epigenetics as a Clue in GDM Pathophysiology
Source: PubMed Central journal article supplement (PMC7014132; doi:10.3390/ijms21020479), 2020-01-12
Supplement: ijms-21-00479-s001.pdf [file ijms-21-00479-s001.pdf]

**Supplementary Table S1.** Primer information for DNA methylation assays

| Methylation assay | Chromosomal location*       | Primer information (5' to 3') |                                        | PCR information    |                      |
|-------------------|-----------------------------|-------------------------------|----------------------------------------|--------------------|----------------------|
|                   |                             | Orientation                   | Bisulfite converted sequence           | Amplicon size (bp) | Annealing temp. (°C) |
| TNF- $\alpha$ R1  | chr6:31,542,413-31,542,518  | Forward                       | TGTGATTATAGTAATGGGTAGGAGAATGTT         | 105                | 52                   |
|                   |                             | Reverse <sup>†</sup>          | TTCACTCCCTAAAACCCTCTACATAAC            |                    |                      |
|                   |                             | Sequencing 1                  | GAATGTTTAGGGTTATGG                     |                    |                      |
| TNF- $\alpha$ R2  | chr6:31,543,125-31,543,346  | Forward                       | AGG GGT ATT TTT GAT GTT TGT GTG        | 222                | 52                   |
|                   |                             | Reverse <sup>†</sup>          | CTA CTA ACT AAA TAT ACC AAC AAC TACC   |                    |                      |
|                   |                             | Sequencing 1                  | GAT GTT TGT GTG TTT TTA ATT TTT TAA AT |                    |                      |
| TNF- $\alpha$ R3  | chr6:31,543,123-31,543,347  | Forward                       | GAGGGGTATTTTGGATGTTTGTGTG              | 223                | 52                   |
|                   |                             | Reverse <sup>†</sup>          | CTACTAACTAAATATACCAACAACACTACC         |                    |                      |
|                   |                             | Sequencing 1                  | ATGGGTTTTTTTTATTAAGGAAGTT              |                    |                      |
| SOCS3 R1          | chr17:76,356,492-76,356,871 | Forward                       | AGGGTIGGTAAAGAATTGG                    | 379                | 50                   |
|                   |                             | Reverse <sup>†</sup>          | CCCTCCCTTCTAAAAAACTAATTT               |                    |                      |
|                   |                             | Sequencing 1                  | TTTAGGTAGGTTTTTTAGAAATTGT              |                    |                      |

|          |                             |                      |                             |                   |               |
|----------|-----------------------------|----------------------|-----------------------------|-------------------|---------------|
| SOCS3 R2 | chr17:76,356,492-76,356,871 | Forward              | AGGGTTGGTAAAGAATTGG         | 379               | 50            |
|          |                             | Reverse <sup>†</sup> | CCCTCCCTTCTAAAAAACTAATTT    |                   |               |
|          |                             | Sequencing 1         | GTTGGTAAAGAATTGGTAG         |                   |               |
| SOCS3 R3 | chr17:76,356,234-76,356,484 | Forward              | AAGTGTGAATGAGAAGTTG         | 251               | 50<br>ZymoTaq |
|          |                             | Reverse <sup>†</sup> | ACCTTCTTATAATATTTAATCACTACT |                   |               |
|          |                             |                      | Sequencing 1                | GTGTGAATGAGAAGTTG |               |

bp, base pairs. CpG, Cytosine followed by guanine nucleotide. \*According to UCSC Genome browser on human Feb. 2009, GRCh37/hg19 assembly. <sup>†</sup>Biotinylated primer.
